# Supplementary material for: A Comprehensive Analysis Identified the Key Differentially Expressed Circular Ribonucleic Acids and Methylation-Related Function in Pheochromocytomas and Paragangliomas
Source: Front Genet. 2020 Feb 25;11:15. doi: 10.3389/fgene.2020.00015 (PMC7052364; doi:10.3389/fgene.2020.00015)
Supplement: Supplementary Table 3 — The information of the 16 PCC peripheral blood. [file Table_3.xlsx]

## Sheet: Sheet1
Sample	Chr	Ref	Alt	Func.refGene	Gene.refGene
PPGL-Blood1	chr12	T	A	exonic	KRAS
PPGL-Blood2	chr17	C	T	exonic	NF1
PPGL-Blood3	chr3	T	G	exonic	VHL
PPGL-Blood4	Not found
PPGL-Blood5	chr17	A	-	exonic	NF1
PPGL-Blood6	chr3	C	A	exonic	VHL
PPGL-Blood7	Not found
PPGL-Blood8	chr3	C	A	exonic	VHL
PPGL-Blood9	chr14	G	A	exonic	MAX
PPGL-Blood10	chr8	G	C	exonic	FGFR1
PPGL-Blood11	Not found
PPGL-Blood12	chr2	C	T	exonic	EPAS1
PPGL-Blood13	chr8	G	T	exonic	FGFR1
PPGL-Blood14	chr17	A	G	exonic	NF1
PPGL-Blood15	Not found
PPGL-Blood16	chr1	T	C	exonic	SDHB
